# Supplementary material
Source: publisher site journal article supplement (https://www.degruyter.com/publication/journal_key/HTM/downloadAsset/HTM_Instructions%20for%20Authors%20HTM.pdf)
Supplement: Supplementary file 1 [file HTM_Instructions%20for%20Authors%20HTM.pdf]

## HTM Journal of Heat Treatment and Materials

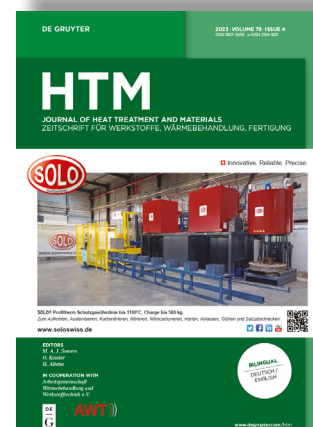

## Table of Contents

|                                                                     |    |
|---------------------------------------------------------------------|----|
| <b>Scope and general policies of the journal</b> .....              | 2  |
| Scope .....                                                         | 2  |
| Article (manuscript) categories .....                               | 2  |
| Submissions in the following fields are welcome .....               | 2  |
| <b>Peer review, turnaround times and preprint policies</b> .....    | 3  |
| Peer review information .....                                       | 3  |
| Turnaround time .....                                               | 3  |
| Rejection of manuscripts .....                                      | 3  |
| Appeals .....                                                       | 3  |
| Preprint policy .....                                               | 3  |
| Inclusive language policy .....                                     | 3  |
| <b>Submission of manuscripts</b> .....                              | 3  |
| ORCID .....                                                         | 4  |
| Submission declaration and verification .....                       | 4  |
| Scientific misconduct .....                                         | 4  |
| Research integrity .....                                            | 4  |
| <b>Post-acceptance</b> .....                                        | 4  |
| Galley proofs .....                                                 | 4  |
| Offprints .....                                                     | 5  |
| Repository policy .....                                             | 5  |
| Subscription-based and hybrid journals .....                        | 5  |
| Copyright .....                                                     | 5  |
| Open Access in hybrid journals .....                                | 5  |
| Article Processing Charges (APCs) .....                             | 5  |
| <b>Ethical conduct of research</b> .....                            | 6  |
| Acknowledgments .....                                               | 6  |
| Authorization for the use of human subjects – Research ethics ..... | 6  |
| Informed consent .....                                              | 6  |
| Author contributions .....                                          | 6  |
| Competing interests .....                                           | 7  |
| Research funding .....                                              | 7  |
| Data availability .....                                             | 7  |
| <b>Preparation of manuscript</b> .....                              | 8  |
| Title page information .....                                        | 8  |
| Language .....                                                      | 8  |
| General format and manuscript elements .....                        | 8  |
| Abstract .....                                                      | 9  |
| Keywords .....                                                      | 9  |
| Headings .....                                                      | 9  |
| References .....                                                    | 9  |
| Figures and figure captions .....                                   | 10 |
| Tables and table captions .....                                     | 11 |
| Abbreviations .....                                                 | 11 |
| Equations and symbols .....                                         | 11 |
| Units .....                                                         | 11 |
| Company and trademark details .....                                 | 11 |
| Audio and Video .....                                               | 11 |

## Scope and general policies of the journal

### Scope

The *HTM* is a bilingual (German-English) independently assessed and periodical standard publication that provides reports on all aspects of heat treatment and material technology in research and production. By publishing trend-setting contributions to research and practical experience reports, the *HTM* helps in answering scientific questions as well as regarding investment decisions in the industry. All articles are subject to thorough, independent peer review.

The *HTM* publishes six issues per volume in print and online (Feb/Apr/Jun/Aug/Oct/Dec).

The *HTM* is the official organ of AWT – Arbeitsgemeinschaft Wärmebehandlung und Werkstofftechnik e.V.

### Article (manuscript) categories

- Research Article
- Technical Article

The general requirements for submissions of articles are as follows:

#### **For a Research Article (scientific paper):**

- corresponds to the subject area of *HTM*,
- contains new and previously unpublished content,
- meets the standard of *HTM* in terms of approach, state of knowledge, results and conclusions,
- contains at least five references to renowned sources/references.

#### **For a Technical Article (technical-industrial paper):**

- concerns *HTM* focus topics and related fields,
- technical objective,
- state of the art,
- solution approach (new plant technology, etc.),
- results obtained with the new technical solution,
- discussion of the results in comparison with the state of the art,
- contains generally usable information (no predominant advertising literature),
- contains at least five references to renowned sources/references.

### Submissions in the following fields are welcome:

Annealing process  
Case hardening  
Component testing  
diffusion processes  
Electromagnetic rays  
Fixture hardening  
Hardening and tempering  
Induction hardening  
Laser hardening  
Material and component properties  
Measuring and testing technology  
Modern firing technology  
Numerical Simulation  
Press hardening  
Process optimization  
Quenching  
Safety engineering  
Straightening processes  
Surface technologies  
Temperature technology  
Thermo chemical

Automation  
Component cleaning  
Defects and damage during heat treatment  
Dimensional and shape change  
FE simulation  
Gas nitriding  
Heat treatment of tool steel  
Integration of heat treatment into manufacturing  
Machinery and plant technology  
Material and heat treatment  
Microstructure of metals  
Nitrocarburizing  
Plasma nitriding  
Process chain influences on heat treatment  
Properties of steels applications  
Residual stress and distortion development  
Sensor technology  
Surface hardening  
Technologies for different application processes  
Testing of the heat treated condition  
Vacuum hardening

## Peer review, turnaround times and preprint policies

### Peer review information

The *HTM* is a single-blind journal. Manuscripts are reviewed by at least two independent reviewers selected by the Editorial Office. The authors may provide the names, institution, country and e-mail addresses of potential reviewers. Reviewers indicated by the authors must be of institutions different from those of any of the authors.

The editors reserve the right to reject submitted manuscripts without peer review if the studies are not novel or important enough to merit publication in the journal. Manuscripts deemed unsuitable (insufficient originality or limited interest to the target audience) will be also rejected without review.

### Turnaround time

The *HTM* aspires to inform authors of the peer review decision within 4–5 weeks from submission date. Revised manuscripts should be returned within 10 days (minor revision)/18 days (major revision).

### Rejection of manuscripts

Manuscripts dealing with subjects that have been well studied in the literature, and that do not resolve questions raised by previous studies, or manuscripts that are statistically underpowered, are likely to be rejected without peer review.

Reporting of negative results must be justified by prior evidence that a positive result would be expected. Manuscripts are also returned to authors if they do not comply with the Instructions for Authors.

### Appeals

Manuscripts that have been rejected for publication will be reconsidered only at the discretion of the Editor(s). Authors wishing to request reconsideration of a previously rejected manuscript must do so in written form and submit a rebuttal by e-mail to the journal's editorial office. Authors should provide detailed reasons why they believe the manuscript should be reconsidered. If the rebuttal is accepted, the author will be asked to re-submit the manuscript.

### Preprint policy

De Gruyter does not consider the following purposes of a paper as pre-publication: publication in the form of a congress abstract, publication as an academic thesis, publication as an electronic preprint on recognized servers such as arXiv, RePEc, bioRxiv, ResearchSquare, etc.

### Inclusive language policy

Inclusive language recognizes diversity, conveys respect for all people, is sensitive to differences and promotes equal opportunities. Content should not make assumptions about readers' beliefs or commitments; should not contain anything that might suggest that one person is superior to another because of age, gender, race, ethnicity, culture, sexual orientation, disability or health condition; and should use inclusive language throughout. Authors should ensure that their writing is free from prejudice, stereotypes, slang, references to the dominant culture and/or cultural assumptions.

We advise the following approach: Aim for gender neutrality by using plural nouns (clinicians, clients, participants) as standard and avoiding "he" or "she", wherever possible. Instead, please use "they". We recommend avoiding the use of descriptors that refer to personal characteristics such as age, gender, race, ethnicity, culture, sexual orientation, disability or health status unless they are relevant and valid.

## Submission of manuscripts

- Submit manuscripts exclusively online at: <https://mc.manuscriptcentral.com/htm>

You will be guided through the whole submission process in ScholarOne Manuscripts System.

We strongly recommend the authors register with institutional e-mail addresses, and refrain from using private e-mail addresses. A cover letter may be submitted for each manuscript upon first submission. It should contain a brief statement by the authors as to the element of novelty upon which they base their request for publication in the *HTM*. Please address the cover letter to the Editor-in-Chief. Revised manuscripts must be accompanied by a point-by-point reply to the reviewers' criticisms. Major changes in the revised manuscript must be highlighted, preferably in tracked changes mode.

## ORCID

The ORCID (Open Researcher and Contributor ID) is a non-profit, publisher-independent system that is used to uniquely identify academics and their publications. Click [here](#) for detailed information about ORCID. Submitting authors can login with username and password. If the journal uses ScholarOne as submission tool, authors can also login with their ORCID number. Providing an ORCID number for each author is strongly recommended. ORCID numbers should be listed on the title page.

## Submission declaration and verification

For information on plagiarism, please refer to [COPE – Committee of Publication Ethics](#). Submission of a manuscript to a journal implies that the work described has not been published previously, except in the form of an abstract, academic thesis, lecture, or preprint; that it is not under consideration for publication elsewhere (multiple, redundant, concurrent publication); that publication of the work is approved by all authors and tacitly or explicitly by the responsible authorities where the work was carried out; and that, if accepted for publication, it will not be published elsewhere, in English, German, or in any other language, without the written consent of the Publisher. Exceptions are listed under Preprint policy.

To exclude potential overlap with prior publication(s), your manuscript may be checked by the plagiarism checker Crossref Similarity Check ([iThenticate](#)). Previously published material must be referenced appropriately in the manuscript, regardless of whether the material was previously published in a subscription based, hybrid or open access journal, or in another language.

## Scientific misconduct

Only articles that have not been or will not be published elsewhere will be published in the journal, excluding articles that fall under De Gruyter's [Repository Policy](#). Multiple submissions/publications or redundant publications (i.e., republication of data already published by the same authors) will be rejected. If identified after publication, the journal reserves the right to publish a retraction note. In any case, editors will follow COPE's Code of Conduct and implement its advice.

## Research integrity

The authors are responsible for all aspects of the study and will ensure that any questions regarding the accuracy and integrity of any part of the work are adequately investigated and resolved.

With submitting your manuscript to the *HTM* the authors declare that they are the sole and intellectual authors of the manuscript. We do not accept submissions that name Artificial Intelligence (AI) and/or Machine Learning Tools as credited author(s) on a manuscript because such tools cannot take responsibility for the submitted work and therefore cannot be considered as eligible authors. Where such tools or technologies are used as part of the design or methodology of a research study, their use should be clearly described in the Acknowledgments section. In case of doubt, the Editorial Board reserves the right to ask the authors to submit the raw experimental data.

## Post-acceptance

### Galley proofs

The corresponding author of an article receives the galley proofs in electronic form to check them for editorial and typesetting accuracy. Corresponding authors receive an e-mail notification ("Check your proof") with a link to the author's page. Here they can download the PDF proof. As soon as the corrections and answers to comments are marked in the PDF file, the author uploads the proof file to the same page and submits it to production. All instructions for proof corrections, including deadlines, will be given in the e-mail notification to the corre-

sponding author, along with a user guide, providing step-by-step instructions for inserting corrections.

Substantial changes to an article accepted for publication will only be considered with the permission of the Editor or after additional peer review. The responsibility for proofreading lies solely with the authors. **According to De Gruyter policy, once an article has been accepted, no changes to the author list and article title are allowed (except typos). The De Gruyter production team is instructed to enforce this policy during the production/proof correction process.**

Proofs are relevant only with respect to the composed type, not for the quality of paper or printing.

### Offprints

Electronic files of typeset articles in Adobe Acrobat PDF format are provided free of charge. The corresponding author will receive an e-mail notification when the article has been published online along with instructions on how to access the article. Additionally, the corresponding author receives one complimentary copy of the issue they have published in.

### Repository policy

Policies for sharing published journal articles differ for subscription-based and open access articles.

#### Subscription-based and hybrid journals

Authors may publish their articles in a public repository after an embargo period of 12 months (see De Gruyter's [Repository Policy](#)). Only the accepted author version of the manuscript, not the PDF version of the published article, can be published:

Immediately

- via their non-commercial personal website, blog or social media channels
- by updating a preprint in arXiv, RePEc, bioRxiv, ResearchSquare, etc. with the version of the accepted manuscript
- as a closed deposit via their research institute or institutional repository for internal institutional purposes or as part of an invitation-only research collaboration workgroup
- directly by providing copies to their students or to research collaborators for their personal use
- for private scholarly sharing as part of an invitation-only work group

After an embargo period of 12 months

- as open deposits to institutional or subject repositories
- to scholarly collaboration networks (SCNs)

### Copyright

Manuscripts are accepted on condition of transfer of copyright ([License to Publish](#)) (for U.S. government employees: to the extent transferable) to the publisher. Once the manuscript has been accepted, it may not be published elsewhere without the consent of the copyright holders.

#### Open Access in hybrid journals

The author declares consent to place the article under the Creative Commons license CC-BY 4.0. In this case, the exclusive rights previously granted to the publisher will be converted into non-exclusive rights. The author confirms that they have already acquired all necessary rights for all components of the work in the event of an open access publication. For more information, refer to paragraph 5 in the [License to Publish](#).

### Article Processing Charges (APCs)

There are **NO** APCs due for publication in the *HTM*. Authors publishing in **hybrid journals** do not have to pay APCs if they do not wish to publish their article open access. After acceptance and before production of an article, authors can decide whether to publish their article open access. Only if they decide to publish open access, APCs will be charged (2000€, excl. VAT). All articles are peer-reviewed and accepted for publication based on the quality of their scientific contribution. The decision to publish open access does not affect the peer review process or the acceptance of the article. De Gruyter has [institutional agreements](#) in place that allow authors to publish open access articles at no cost at all – or with a significant discount. For more information on De Gruyter's open access policy, please read our [Open Access Policies](#).

## Ethical conduct of research

**Manuscripts must follow certain ethical guidelines** to be considered for publication. These can generally be found in the [Publication Ethics and Malpractice Statement](#). Accordingly, **before submitting your manuscript, please make sure that you and your co-authors agree to the applicable requirements**. For example, this may involve declaring and ruling out conflicts of interest or proving compliance with legal requirements related to human and animal testing.

Furthermore, our [Code of Conduct for Publication Procedures and Ethics](#) defines the responsibility of De Gruyter as a publisher and the Editors we work with, to ensure the legitimacy and quality of our published research. Our principles are based on the guidelines of the [Committee on Publication Ethics \(COPE\)](#).

## Acknowledgments

Authors may wish to acknowledge individuals, working groups, institutions, etc. who provided help and support (other than financial) during research and the preparation of the manuscript (e.g., language checking, writing assistance or proof reading of the article, etc.). Individuals acknowledged are not included on the title page, as a footnote to the title or otherwise.

With submitting your manuscript to the *HTM* the authors declare that they are the sole and intellectual authors of the manuscript. We do not accept submissions that name Artificial Intelligence (AI) and/or Machine Learning Tools as credited author(s) on a manuscript because such tools cannot take responsibility for the submitted work and therefore cannot be considered as eligible authors. Where such tools or technologies are used as part of the design or methodology of a research study, their use should be clearly described in the Acknowledgments section.

## Authorization for the use of human subjects – Research ethics

Manuscripts that contain information on the use of humans should clearly state that the research complies with all relevant national regulations and institutional policies and has been approved by the authors' Institutional Review Board or any equivalent Committee. The Editors reserve the right to seek additional information or guidance from reviewers on any cases in which concerns arise. All investigations with human subjects must be conducted by following the tenets of the [Declaration of Helsinki](#), what is more authors must identify the Committee or Institutional Review Board approving the experiments, and provide a statement indicating approval of the research. If applicable, information on research ethics and/or approval by the Institutional Review Board should be given in the Methods section.

If required for submission, submit the [Template for Ethical and Legal Declarations](#) file that asks you to comment on Research Ethics. Provide the same information here. Make sure that the information in the manuscript matches the information in the template.

If a study did not require human ethical approval, a corresponding statement should be given in the Methods section. If required for submission, submit the [Template for Ethical and Legal Declarations](#) file provide the same information here, or *Not applicable*.

## Informed consent

The [Protection of Privacy](#) is a legal right that must not be infringed without individual informed consent. In cases where the identification of personal information is necessary for scientific reasons, authors should obtain full documentation of informed consent, including written permission from the patient or their legal guardians prior to inclusion in the study. The following (or similar) statement should be given in the Methods section: *Informed consent was obtained from all individuals included in this study*.

If required for submission, submit the [Template for Ethical and Legal Declarations](#) file that asks you to comment on Informed Consent. Provide the same information here. Make sure the information in the text of the manuscript matches the information in the template. If informed consent was not required, insert *Not applicable*. after Informed consent in the [Template for Ethical and Legal Declarations](#).

## Author contributions

In view of research integrity, authorship is generally confined to an individual who has made a substantial intellectual or practical contribution to the conception or design of the project or the acquisition, analysis, or interpretation of data for the work of a publication and/or has drafted the work or reviewed/revised it critically for important intellectual content. The individual(s) listed as author(s) must agree to be accountable for said



contribution and approve of the final version. **Honorary authorship is not allowed.**

Individuals who helped or participated in certain substantive aspects of the project or work (e.g., technical services staff), but whose contributions were not of sufficient extent to be listed as co-authors, should be appropriately acknowledged, usually in an Acknowledgements section.

Authors must declare their responsibility for the entire content of the manuscript and may indicate the individual contributions of each author, if applicable. The author contribution statement should appear on the title page before the Reference section as the following default statement: *All authors have accepted responsibility for the entire content of this manuscript and approved its submission.* or *The author has accepted responsibility for the entire content of this manuscript and approved its submission.*

If required for submission, submit the [Template for Ethical and Legal Declarations](#) file that asks you to comment on Author Contribution. Provide the same information here as in the manuscript. Make sure that the information in the manuscript matches the information in the template.

### Competing interests

A conflict of interest for a particular manuscript exists when a participant in the peer review and publication process – author, reviewer, and Editor – has ties to activities that could inappropriately influence his or her judgment, regardless of whether the judgment is actually affected. Financial relationships with industry (for example, employment, consultancies, stock ownership, honoraria, patent applications, expert testimony, grants and other funding), either directly or through immediate family, are usually considered the most important conflicts of interest. However, conflicts can occur for other reasons, such as financial support of the study, ties to health insurance, politics or other stakeholders, personal relationships, academic competition, and intellectual passion.

To ensure fair and objective decision-making, authors must declare any associations that pose a conflict of interest (financial, personal or professional) in connection with the manuscript under evaluation. This must be declared during the submission process and also at the end of the manuscript. If you do not have a statement to make, please insert *None declared*. The conflict-of-interest statement should appear on the title page of double-blinded journals, and before the Reference section of single-blinded journals. If applicable, submit the [Template for Ethical and Legal Declarations](#) file that asks you to comment on the Competing interests. Provide the same information here as in the manuscript. Make sure that the information in the manuscript matches the information in the template.

If you do not have a statement to make, the default statement will be set in place: *The authors state no conflict of interest.*

### Research funding

Funding sources should be listed at the end of the manuscript, before the References and/or indicated in the [Template for Ethical and Legal Declarations](#), if required for submission, after Research Funding. When the study benefitted from funding through an unrestricted grant or other resources provided to a university, college, other research institution, or an individual author, state the name of the institute or organization that provided the funding along with the grant number, if applicable.

If no funding was provided for the research, the default statement will be set in place: *None declared*.

### Data availability

HTM requires authors to follow our [Data Sharing Policy](#), which must comply with the European GDPR (*General Data Protection Regulation*) rules. Research data should be made widely available to the research community to demonstrate the robustness and validity of the research presented in the journal, to enable and encourage replication of the results, and to allow the community with opportunities to learn.

By publishing in the journal, authors are required to provide a data availability statement (DAS) in their articles. The DAS confirms the presence or absence of shared data. The DAS should include information on where the data supporting the findings reported in the article can be found, including, if applicable, hyperlinks to publicly archived datasets analyzed or generated during the study. If research data are not publicly available, this must be stated in the manuscript, as well as the conditions for accessing the data.

Authors are encouraged to share their data but are not required to do so. The decision to publish will not be affected by whether or not authors share their research data.

The DAS should be included either before the References or in the [Template for Ethical and Legal Declarations](#), which is required for submission.

## Preparation of manuscript

### Title page information

Please provide the following information on the first page of your manuscript during the submission process:

- Authors names

Write at least one given and family name in full. For all other names, initial is sufficient. List authors in the order you want them to appear in the final version. Indicate the corresponding author by using an asterisk “\*” after the family name. Please note that as per De Gruyter policy, no author list changes are permitted after acceptance of a manuscript.

Author footnotes (superscript letters or numbers) to explain authorship details are not all allowed in the author line and will be converted to an author note on the first page. Kindly stick to the wording as in the examples below:

- [Full name author A] and [full name author B] contributed equally to this work.
- [Full name author A] and [full name author B] contributed equally to this work and share first authorship.
- [Full name author A] and [full name author B] share senior authorship.
- [Full name author A] and [full name author B] share first authorship.

- Title and short title

Provide a descriptive, concise and comprehensible main title as well as an abbreviated form of the main title (running head) with no more than 75 characters (including blanks). The short title will be displayed on the top of each page of the final version. A subtitle is permitted.

Please note for the English version: The article title and subtitle should be in title case. Use uppercase letters after colon.

In case the content of your article has been presented as a lecture on a conference/congress, please add an asterisk to the title stating the title, place and date of said congress/conference.

- Affiliations

For all authors please supply the following details: academic degree, company/institute with company/institute name and address (street, city, postal code, country), e-mail address (for the corresponding author).

Supplying an ORCID is highly recommended (for more information and registration, please visit the ORCID webpage: <https://info.orcid.org/benefits-for-researchers/>)

### Language

All manuscripts must be written in clear and concise German, American or British English. Please use British or American English consistently. If you have reasons to doubt your proficiency with respect to spelling, grammar, etc. (e.g., because German or English is not your native language), then you may wish to employ—at your expense—the services of a professional language editor organized by the authors. The translation to the second language can be managed via the Editorial Office or the authors. Please note that German translations can be proofread by the Editorial Office whereas the proofreading of the English translations need to be arranged for by the authors.

### General format and manuscript elements

Please draft your manuscript with a word processing program (not LaTeX).

**The text must be written as a continuous text with no manual returns and no automatic word division, please set the line spacing to one and a half.**

The length for Research and Technical Articles should be about 6–10 non-typeset pages with a maximum of 12 figures/tables (in total).

A numbered structure (example: Abstract – Keywords – 1 Introduction – 2 Schedule of experiments – 3 Experiments – 4 Results – 5 Conclusions – 6 Summary) is required.

Please use the technical terms listed in the European Standard DIN EN ISO 4885:2018-07, „Eisenwerkstoffe – Wärmebehandlung – Begriffe“ (Ferrous materials – Heat treatments – Vocabulary (ISO 4885 : 2018); Matériaux



ferreux – Traitements thermiques – Vocabulaire (ISO 4885 : 2018)), physical quantities are to be presented in international units as listed in DIN 1304 and DIN 1301 (SI units).

Please see the [Manuscript Checklist](#) for detailed information on length and structure of specific article types.

The general requirements for submissions of articles are as follows:

**For a Research Article (scientific paper):**

- corresponds to the subject area of *HTM*,
- contains new and previously unpublished content,
- meets the standard of *HTM* in terms of approach, state of knowledge, results and conclusions,
- contains at least five references to renowned sources/references.

**For a Technical Article (technical-industrial paper):**

- concerns *HTM* focus topics and related fields,
- technical objective,
- state of the art,
- solution approach (new plant technology, etc.),
- results obtained with the new technical solution,
- discussion of the results in comparison with the state of the art,
- contains generally usable information (no predominant advertising literature),
- contains at least five references to renowned sources/references.

### Abstract

Give a concise summary of your article in an abstract of approx. 200 words in a single paragraph including include the most important prerequisite conditions, objectives and results of the work. As abstracts are published separately by abstracting and indexing services, please spell out abbreviations at first use and do not include footnotes, tables, figures, equations or references.

### Keywords

Keywords are used by abstracting and indexing services as well as search engines to facilitate finding your paper. Together with the abstract of your paper, they are a key tool enabling readers to find your paper and for increasing citations.

Supply at least 5 specific keywords in lower case, separated by comma.

These can be single words, but also short phrases representing the content. Make sure to select precise and concise keywords to your field or sub-field of research. Avoid abbreviations and the repetition of words already used in the article's title.

### Headings

Your manuscript should be subdivided into sections (and, if necessary, subsections). These sections should be labeled with headings in a consistent format (Arabic numerals) and with a clear hierarchy of section headings. Limit your subsections to a maximum of four levels. For subdivided sections ensure that they have at least two subheadings on one level. Headings do not have an end period.

### References

The reference style for the *HTM* is **ACS numbered**.

Literature references to other papers, books, etc. should be numbered consecutively starting at the beginning of the article. Use square brackets (e. g. Smith [1], according to recent theories [2–7]) and list the reference by number (without brackets) in the reference list.

Only generally accessible sources may be used as literature references; in the case of a “personal communication”, the address/company/institute where the individual can be reached must be stated.

Articles from periodicals are to be cited using the following sequence: Author(s) last name, abbreviated first name: Title of the cited article. Title of the periodical volume (year) issue number, page number(s), DOI.

All authors who contributed to the article must be listed. (Hornig et al., for instance, can be used only when cited within the text.)

When citing books, the author, title, publisher, place of publication and year, together with the referenced page(s) must be listed (in this sequence!).

If available, DOI (digital object identifier) numbers or ISBN should be added to references.

In the case of patents, in addition to the country, the patent number and the date filed, the inventor(s) and applicant are to be stated.

#### Examples:

##### Journal

1. Waldeck, S.; Castens, M.; Riefler, R.; Frerichs, F.; Lübken, T.; Fritsching, U.: Mechanisms and Process Control for Quenching with Aqueous Polymer Solutions. HTM J. Heat Treatm. Mat. 74 (2019) 4, pp. 238–256, DOI: 10.3139/105.110387

##### Book

2. Beswick, J. M. (Ed.): Bearing Steel Technology – Advances and State of the Art in Bearing Steel Quality Assurance, 7th Volume. STP1465, ASTM International, West Conshohocken, PA, USA, 2007, DOI: 10.1520/stp1465-eb

##### Thesis

3. Merkel, J.: Untersuchungen zum Einfluss von Kugelstrahl- und Festwalzbehandlungen auf den Randschichtzustand und die Schwingfestigkeit von Sintereisenwerkstoffen. Dissertation, Universität Karlsruhe, 2008

##### Proceedings

4. Reich, M.; Milkereit, B.; Krawutschke, M.; Kalisch, J.; Schick, C.; Kessler, O.: Advanced dilatometry and calorimetry for the validation of materials mechanical and transformation models. Proc. 2nd World Congr. on Integrated Computational Materials Engineering, 07.-11.07.13, Salt Lake City, USA; M. Li, C. Campbell, K. Thornton, E. Holm, P. Gumbsch (Hrsg.), 2013, pp. 177-182, DOI: 10.1002/9781118767061.ch28

##### Standard

5. DIN EN 10216-2 : 2007-10: Nahtlose Stahlrohre für Druckbeanspruchungen. Teil 2: Rohre aus unlegierten und legierten Stählen mit festgelegten Eigenschaften bei erhöhten Temperaturen. Beuth, Berlin, 2007

**We request that the author(s) check the literature reference carefully in the final version of the manuscript.**

#### **Figures and figure captions**

Graphs, line drawings, photographs, schemes, diagrams, etc. may be used to illustrate your findings. Publication of color figures is provided free of charge in both online and print editions. The publication quality always depends directly on the quality and size of the delivered data.

Please note that figures as well as schemes, diagrams, tables etc. will only be inserted once in the bilingual article, preferably with labels and information in English.

Please label the illustrations as “Figure”. **Each figure should be uploaded separately as .jpg, .eps, .png, .tiff or PDF file.** Images should have a minimum resolution of 300 dpi (color or black-white pixel graphics/half-tone images) in the intended size (600dpi combination of pixel graphic and line drawing, 1000dpi for line drawings). When drawing bar graphs, use patterning/color instead of grey scales (faint shading may be lost upon reproduction). Figures should not display any frames.

We kindly ask for the delivery of images which correspond to the column width of 85mm and in which the relation of image caption to text size seems to be appropriate.

Figures should be numbered consecutively using Arabic numerals (from 1) throughout the text. If you include multi-part figures, please make sure to label all part figures by using lowercase letters combined with a closing parenthesis (e.g., a), b)). Please make sure that all figures are explicitly referred to in the text. Do not end the text immediately preceding the suggested positioning of a figure with a colon and avoid expressions such as “in Figure 1 below/above”, as the exact positioning of these elements cannot be determined until after the manuscript has been typeset. Note that figures will usually be placed on the top or the bottom of the page in the final layout. Provide a concise and self-explanatory caption for each figure. In case of multi-part figures, please include a main caption as well as part figure captions. Figure/table captions should be given at the end of the text (word document). The main caption should be separated, if necessary, from the part figure captions by a full stop, e.g., Fig. 1.

This is the main caption. a) This is part figure caption a, b) this is part figure caption b.

The axes of graphs must be labeled, dimensions to be shown at the upper left and lower right between the numbers (German Standard DIN 461: „Graphische Darstellung in Koordinatensystemen“, Graphic Representation in Coordinate Systems).

Use consistent and only essential labeling in graphs (remove all unnecessary text).

The key to the symbols depicted in the figures should be included in the figure itself, where possible. Otherwise, include it in the caption. The caption itself should not be included in the figure.

Please make sure that letters, numbers, symbols, text, etc. included in the figure are clear, easy to read (not below 6pt, preferably in Arial or Helvetica) and uniform in style.

It is the authors' responsibility to use images that do not infringe on any copyrights, performing rights, trademark rights, personal rights or any other third-party rights or are otherwise unlawful. Copyright permissions can be obtained through the Copyright Clearance Center (<https://www.copyright.com/>).

### Tables and table captions

Number tables consecutively using Arabic numerals. Tables should be provided in an editable source format (Word). Please avoid handing in tables as image or Excel files.

Provide a short descriptive title, column heads, and (if necessary) footnotes to make each table self-explanatory. In column heads, separate units with a comma and use parentheses or square brackets for additional measures (e.g., %, range, etc.). Use footnotes in alphabetical order (a, b, c, etc.) to give emphasis or further information. Expand abbreviations used in tables in footnotes.

In case bold type or italics are used to highlight information, please explain their meaning.

Avoid color, shading, vertical lines, and other cell borders. Note that most horizontal lines within the table body will be removed during the production process.

Indicate where to place the table approximately (e.g., [Place Table 1 near here]). Do not end the text immediately preceding the suggested positioning of a table with a colon and avoid expressions such as “in Table 1 below/above”, as the exact positioning of these elements cannot be determined until after the manuscript has been typeset. Note that tables will usually be placed on the top or the bottom of the page in the final layout.

Figure/table captions should be given at the end of the text (word document).

### Abbreviations

The use of abbreviations and acronyms is permitted given that they are expanded in full when used the first time with the abbreviation in parentheses (applies to abstract and main text). Please use them consistently thereafter. Avoid using non-standard abbreviations unless they appear more than three times in the text. We recommend providing a list with an overview of all abbreviations.

### Equations and symbols

Equations should be well-aligned and not crowded. Use only Latin and Greek alphabets. Avoid complicated superscripts and subscripts by introducing new symbols. Avoid repetition of a complicated expression by representing it with a symbol. For MS Word submissions create equations using the Microsoft equation editor or a corresponding add-on. In mathematical equations that are not created using the formula editor, ensure that characters cannot be misinterpreted (e. g. o, 0, 0 or 1, I, l). Do not submit math equations as images, but as editable text. Number displayed equations consecutively with Arabic numerals in parentheses in the right margin (if referred to in the text). In case your manuscript contains numerous equations and/or formulae, please upload a separate PDF as reference file during submission, to make sure that they are depicted and typeset correctly.

### Units

Only the international units of measure listed in DIN 1301 may be used.

### Company and trademark details

Use of company names and/or company-owned tradenames in the text is to be avoided.

### Audio and Video

For all examples connected to an audio/video recording, supply audio/video clips. Deliver these clips as separate files and do not integrate them directly into the manuscript.

Name all your clips using the following convention:

e.g., audio-1-smith.MP3, video-1-smith.MP4,

[media]-[identifier]-[author-family-name].[extension]

Indicate the position in the article by placing a marker as follows:

[associated audio-1-smith.wav with example (1)]

Provide a short caption for each media file and number them consecutively. Any other media files can be included as part of the supplementary material.

File naming: audiosupplement-1-smith.MP3,

[media.supplement]-[identifier]-[author-family-name].[extension]

The following formats are preferred: audio files in MP3 (at least 16 bit) and video files in MP4 (at least a height of 480 pixels and a frame rate of 25). However, other common formats are also permitted.

**For further questions please contact:**

Editorial office:

Belinda Schicks ([schicks@iwt-bremen.de](mailto:schicks@iwt-bremen.de))

Leibniz-Institut für Werkstofforientierte Technologien – IWT (Bremen, Germany)

Publisher:

Dagmara Magryta ([Dagmara.Magryta@degruyter.com](mailto:Dagmara.Magryta@degruyter.com))

Journal Coordinator, De Gruyter (Berlin, Germany)
